# Supplementary material
Source: Springer Nature journal article supplement (https://www.springermedizin.de/resource/supplementary/12888_2011_855_MOESM1_ESM.pdf/9478368)
Supplement: MOESM1 [file 9478368]

Timeline

Admission to facility

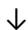

Physical and psychiatric examination

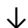

Initial contact by research team

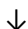

Consent to participate

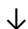

Baseline assessment



Randomisation

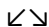

Exercise augmentation      Usual care control

Week 0

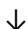

Weekly exercise sessions

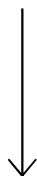

Weeks 1-12

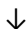

Post intervention assessment

Week 12
